1 Short-term heritable variation cancels hundreds of generations of mutational variance for  
2 metabolic traits in *Caenorhabditis elegans*

3

4 Lindsay M. Johnson\*, Olivia J. Smith\*, Daniel A. Hahn<sup>†,‡</sup>, and Charles F. Baer<sup>\*‡</sup>

5 \* – Department of Biology, University of Florida, Gainesville, Florida, 32611

6 † – Department of Entomology and Nematology, University of Florida, Gainesville, Florida,

7 32611

8 ‡ – University of Florida Genetics Institute, Gainesville, Florida, 32611

9

10

11 Heritable Metabolic Variance

12

13 Keywords: Epigenetic; Metabolic enzyme; Mutation accumulation; Mutational variance;

14 transgenerational inheritance

15

16 Charles F. Baer

17 Department of Biology/University of Florida Genetics Institute

18 P.O. Box 118525

19 University of Florida

20 Gainesville, FL 32611-8525 USA

21  
22  
23  
24  
25  
26  
27  
28  
29  
30  
31  
32  
33  
34  
35  
36  
37  
38  
39  
40  
41  
42  
43

## ABSTRACT

Metabolic disorders commonly have a large heritable component, and have increased markedly over the past few generations. Genome-wide association studies of metabolic traits typically find a substantial unexplained fraction of the total heritability, suggesting an important role for the effects of spontaneous mutation. An alternative explanation, considered less likely, is that epigenetic effects contribute significantly to the heritable variation. Here we report a study designed to quantify the cumulative effects of spontaneous mutation on adenosine metabolism in the nematode *Caenorhabditis elegans*, including both the activity and concentration of two metabolic enzymes (ADA and ADK) and the standing pools of their associated metabolites. A previous study with the same set of *C. elegans* mutation accumulation (MA) lines found a large cumulative effect of mutation on adenosine concentration. The only prior study on the effects of mutation on metabolic enzyme activity, in *Drosophila melanogaster*, found that total enzyme activity presents a mutational target similar to that of morphological and life-history traits. However, those experiments were not designed to account for short-term heritable effects. We find that the means of some traits (6/17) change significantly over the course of ~250 generations under MA conditions, consistent with previous findings, but that the short-term heritable variance for all but one trait (total soluble protein concentration) is of the same order of magnitude as the mutational variance. This result has important implications for the design and interpretation of MA studies, and suggests that the potential effects of epigenetic variation in human metabolic disease warrant additional scrutiny.

44 INTRODUCTION

45 Human metabolic diseases have increased markedly in frequency over the past few generations  
46 (SAKLAYEN 2018). Large genome-wide association studies (GWAS) conducted on the human  
47 metabolome have shown that metabolic traits are highly heritable, but that a substantial fraction  
48 of the heritability of metabolic traits remains unexplained by the cumulative effects of mQTL  
49 (RHEE *et al.* 2013; SHIN *et al.* 2014; MAHAJAN *et al.* 2018). This discrepancy indicates that the  
50 remainder of the heritable variation is the result of some combination of (1) rare, highly  
51 deleterious variants recently arisen in the population; (2) many variants with effects too small to  
52 be detected by the typical GWAS (MANOLIO *et al.* 2009; EICHLER *et al.* 2010; BOYLE *et al.* 2017);  
53 and/or (3) cross-generational epigenetic effects that are heritable but leave no genetic signature  
54 (FURROW *et al.* 2011; RICHARD *et al.* 2017). Scenarios (1) and (2) imply a significant role of  
55 spontaneous mutation in the risk of metabolic disease, although the rapid increase in frequency  
56 further implies some sort of genotype-environment interaction. A recent onslaught of epigenetic  
57 effects is considered less likely as a general explanation for the "missing heritability" of human  
58 complex traits (WAINSCHEIN *et al.* 2019), but specific examples of cross-generational effects  
59 are known in humans (PEMBREY *et al.* 2006; CURLEY *et al.* 2011; VEENENDAAL *et al.* 2013;  
60 RANDO AND SIMMONS 2015), and are well-documented in other organisms (e.g., plants; MUNIR *et*  
61 *al.* 2001; LUNA *et al.* 2012; RASMANN *et al.* 2012) and *C. elegans*; (GREER *et al.* 2011; REHAVI  
62 *et al.* 2011; ASHE *et al.* 2012; JOBSON *et al.* 2015; MARRÉ *et al.* 2016).

63 To our knowledge, the cumulative effects of spontaneous mutation on metabolic traits  
64 have been investigated in only two experiments. In a groundbreaking study in *Drosophila*  
65 *melanogaster*, CLARK *et al.* (1995) quantified the input of mutational (co)variance in the activity  
66 of a set of 12 metabolic enzymes and two metabolites. Mutational heritability ( $h_M^2$ , the per-  
67 generation increase in genetic variation ( $V_M$ ) scaled as a fraction of the residual variance,  $V_E$ ) of  
68 enzyme activity was on the order of that of life-history and morphological traits ( $h_M^2 \approx 10^{-3}$ /  
69 generation; HOULE *et al.* (1996)). In several of the mutation accumulation (MA) lines studied,

70 there were large changes in enzymatic activity relative to the population mean over the course  
71 of 44 generations of evolution under minimal selection. Results for the two metabolites studied  
72 were analogous, but there was no attempt to assess the relationship between enzyme activity  
73 and metabolite concentration in the context of metabolic pathways.

74 More recently, DAVIES *et al.* (2016) examined the changes in metabolite concentration  
75 for 29 metabolites in a set of *C. elegans* MA lines that had undergone ~250 generations of  
76 evolution under minimal selection and found that metabolites vary considerably in their  
77 response to spontaneous mutation, as quantified by the change in mean metabolite  
78 concentration ( $\Delta M$ ) and by the mutational (co)variance. Associations between mutational  
79 correlations between pairs of metabolites ( $r_M$ , presumably the result of pleiotropy) and proximity  
80 of the metabolites in the global metabolic network were, on average, positive but weak  
81 (JOHNSON *et al.* 2018). The weakness of the association between mutational pleiotropy and  
82 network proximity suggests that pleiotropic effects propagate throughout the metabolic network  
83 and are not confined to local modules. However, there was no attempt to link changes in  
84 metabolite concentration to the properties of associated metabolic enzymes.

85 Here we report results of a study designed to investigate the cumulative effects of  
86 mutation on the concentration and activity of the enzymes in the adenosine metabolism pathway  
87 and their associated metabolites (Figure 1), using the same set of *C. elegans* MA lines as in  
88 DAVIES *et al.* (2016). We chose this particular metabolic pathway for investigation because  
89 adenosine was one of the metabolites with the largest mutational variance, indicative of a large  
90 mutational target. In addition, adenosine levels are assumed to be tightly regulated due to its  
91 role as a critical signaling molecule for energetic homeostasis as a metabolite involved in ATP:  
92 AMP, as well as having other critical functions (PARK AND GUPTA 2008; BOISON 2013). Lastly,  
93 the adenosine pathway has well-defined network topology and is highly conserved.

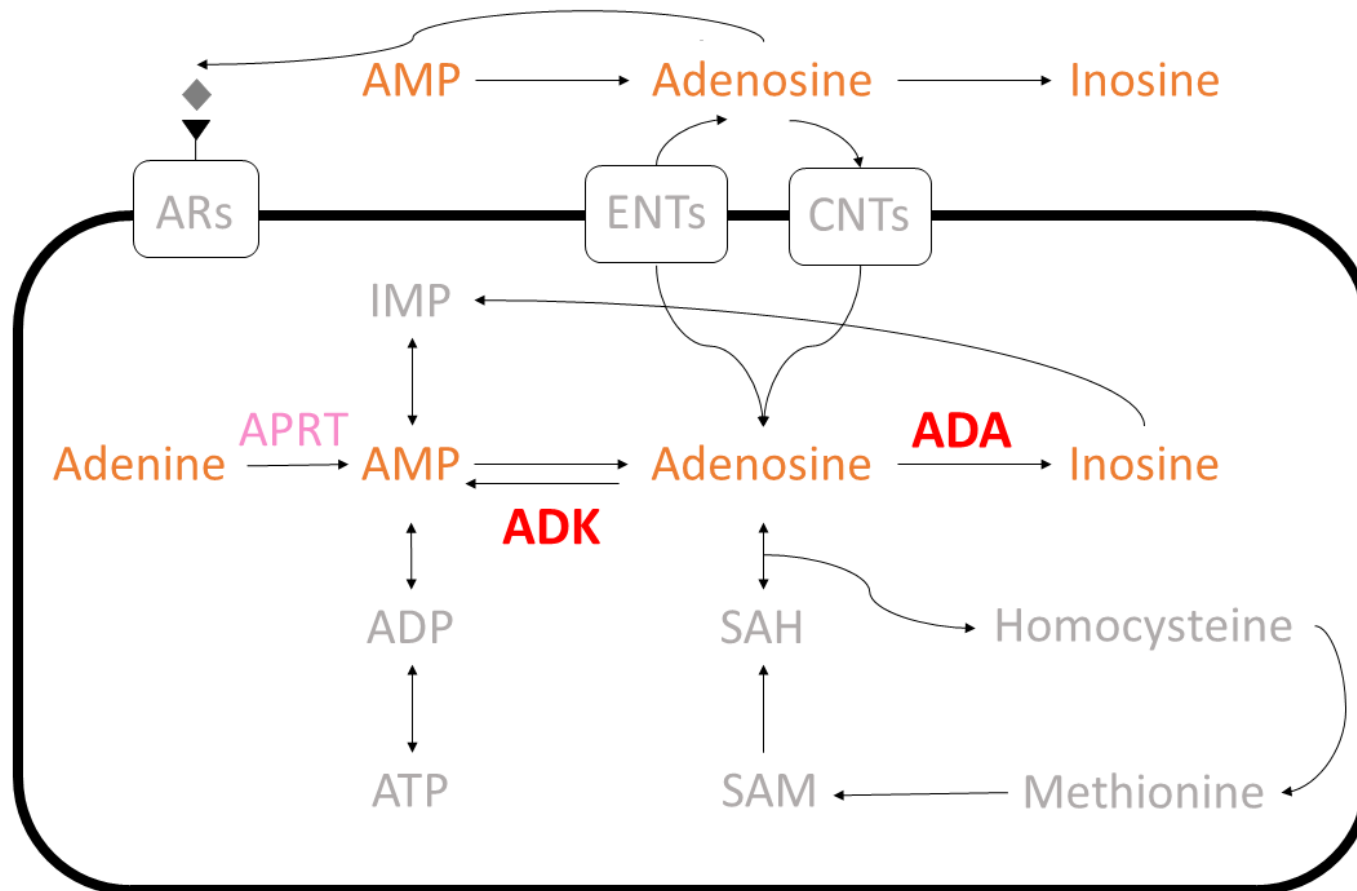

94

95 **Figure 1.** Adenosine metabolism pathway. Activity and concentration of enzymes Adenosine deaminase (ADA, red) and  
 96 Adenosine kinase (ADK, red) were measured. We were unable to measure the concentration of APRT (pink). Metabolites  
 97 in orange had concentrations quantified, those in gray were not measured.

98 In contrast to the aforementioned studies (CLARK *et al.* 1995; DAVIES *et al.* 2016;  
99 JOHNSON *et al.* 2018), our experimental design allows us to infer the relative contributions of  
100 both mutation and short-term heritable (i.e., epigenetic) effects on the total heritable variance of  
101 metabolic traits.

102

103

## MATERIALS AND METHODS

### 104 **Mutation Accumulation:**

105 A detailed description of the construction and propagation of the mutation accumulation (MA)  
106 lines is given in BAER *et al.* (2005). Briefly, 100 replicate MA lines were initiated from a nearly  
107 isogenic population of N2-strain *C. elegans* and propagated by single-hermaphrodite descent at  
108 four-day (one generation) intervals for approximately 250 generations. The common ancestor of  
109 the MA lines ("G0") was cryopreserved at the outset of the experiment; MA lines were  
110 cryopreserved upon completion of the MA phase of the experiment (Figure 2). Based on  
111 extensive whole-genome sequencing (DENVER *et al.* 2012; SAXENA *et al.* 2019), we estimate  
112 that the average MA line carries about 60-80 mutant alleles in the homozygous state. In this  
113 study we used the same 43 N2-strain MA lines assayed by DAVIES *et al.* (2016).

114 The ideal design of a phenotypic assay of a MA experiment includes replicates of the  
115 (putatively) unmutated common ancestor, which we call "pseudolines" and which are treated  
116 identically to MA lines in analyses (LYNCH 1985; LYNCH AND WALSH 1998; TEOTÓNIO *et al.*  
117 2017). The among-pseudoline component of variance includes the effects of residual  
118 segregating genetic variation in the ancestor, as well as short-term heritable (epigenetic) effects  
119 that are propagated across assay generations and purely environmental effects resulting from  
120 (sometimes unavoidable) imperfections of experimental design, such as a temporal correlation  
121 between line and assay time. In the absence of a pseudoline control, some fraction of the  
122 among-MA line (co)variance will potentially be the result of non-mutational factors, and resulting  
123 estimates of  $V_M$  and  $COV_M$  will be upwardly biased.

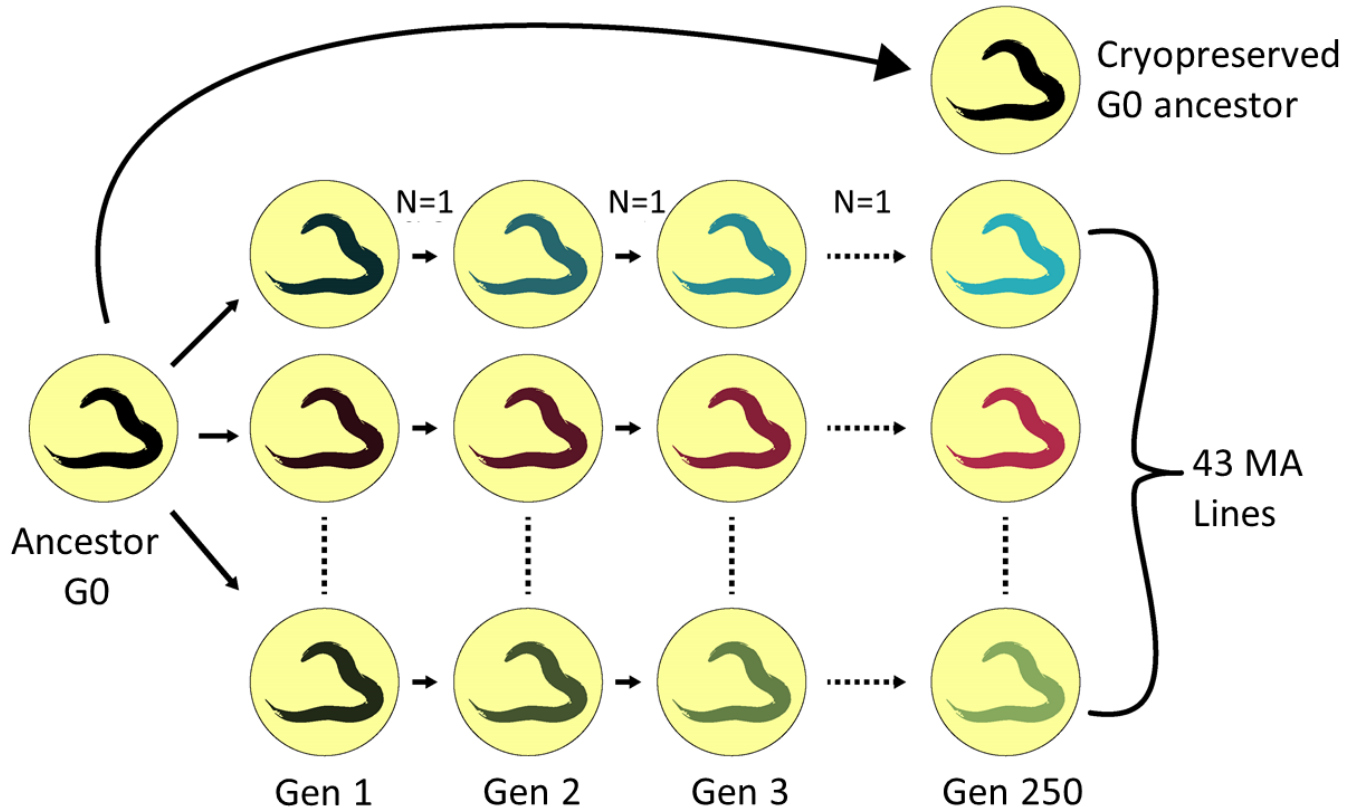

124

125

126 **Figure 2.** Propagation of mutation accumulation (MA) lines. The G0 ancestor was  
127 thawed from a cryopreserved sample and a single hermaphrodite picked onto each of  
128 100 agar plates. MA lines were propagated via single worm descent for ~250  
129 generations. 43 MA lines and the G0 ancestor were included in this experiment.



130 Here, a set of 15 pseudolines (PS) of the G0 ancestor were included along with the MA  
131 lines (Figure 3A). PS lines were generated by thawing a sample of the N2 ancestor and allowing  
132 it 24 hours to recover from freezing, at which time 15 hermaphrodites were plated individually  
133 onto 60 mm NGM plates seeded with 100  $\mu$ l of an overnight culture of *E. coli* OP50 (P0  
134 generation in Figure 3A). P0 worms were allowed to reproduce until the bacterial food on the  
135 plate was consumed (two generations; F1 and F2), at which time worms were cryopreserved  
136 (F2) (HOPE 1999). The demographic features of this protocol mimic those of our standard  
137 protocol for cryopreserving MA lines. From this point forward, MA lines and ancestral PS lines  
138 are experimentally identical.

139

#### 140 **Protein Extraction:**

141 This study includes six independent experimental tests: concentration and activity of two  
142 enzymes (ADA and ADK), total protein concentration, and mass spectrometry of pooled  
143 metabolites (*Note*: we were only able to include two of the three enzymes in the adenosine  
144 pathway, ADA and ADK (Figure 1). We were unable to measure the activity of the third enzyme  
145 in the pathway, adenosine phosphoribosyltransferase (APRT), because commercially available  
146 assay kits require too much material to be practical for application to *C. elegans*. Accordingly,  
147 six aliquots of protein (plus metabolites) were extracted and cryopreserved from the same  
148 individual sample of each experimental replicate. Protein extraction was performed in five  
149 blocks of 10-12 lines per block, to ensure that all samples were handled at the appropriate stage  
150 of development (see below). In each protein extraction block, the lines selected were a random  
151 mix of MA and PS lines; the experimental design is outlined in Figure 3B. Each line was thawed  
152 and transferred onto a 60mm agar plate. The following day, five L4-stage hermaphrodites from  
153 each line were transferred individually onto 35mm agar plates (parental generation, P1 in Figure  
154 3B), resulting in a total of 290 samples (five replicates of each of 15 PS lines and 43 MA lines).  
155 Four days later, a single offspring (F1 generation) L4 hermaphrodite was transferred from each

A)

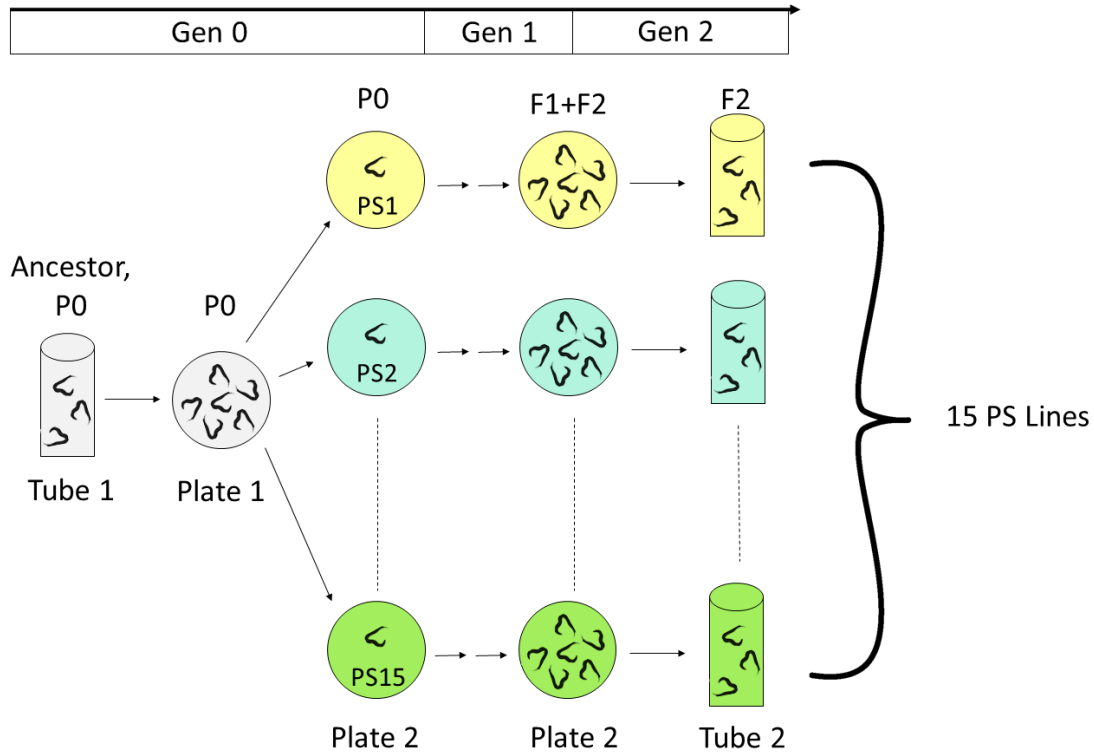

156

B)

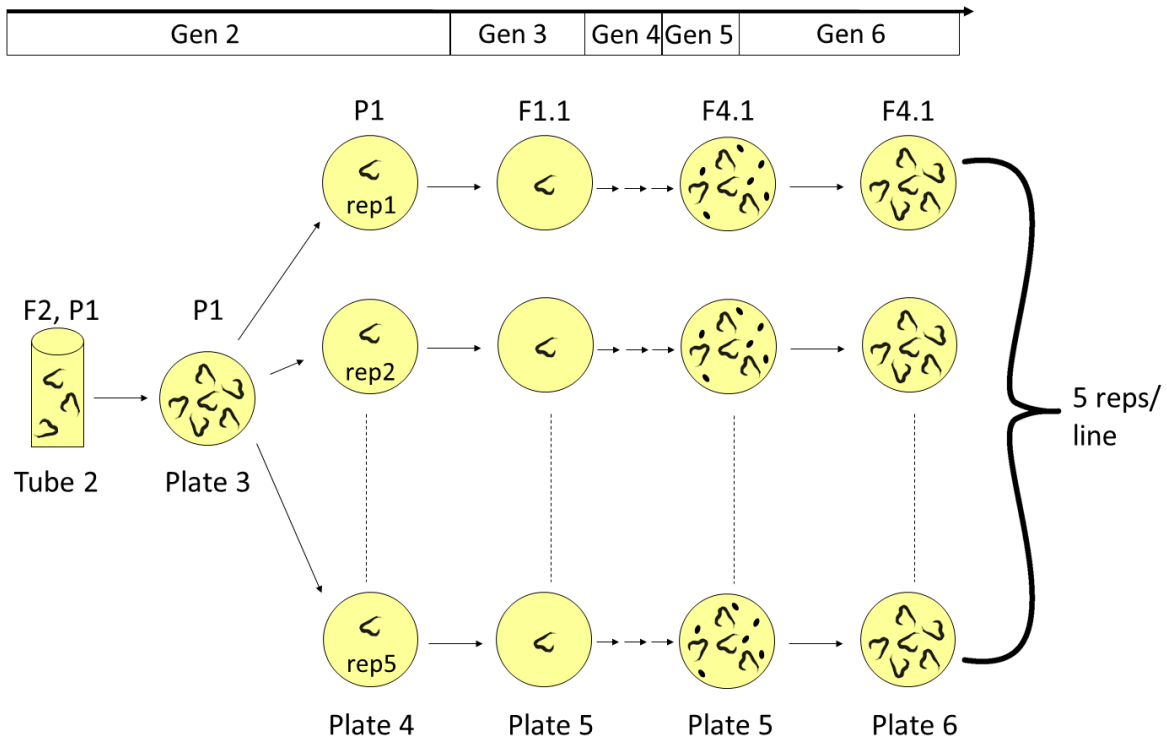

157

158 **Figure 3. A)** Generation of G0 pseudolines (PS lines). The G0 ancestor was thawed  
159 from a cryopreserved sample ("Tube 1", "Plate 1") and 15 individuals were picked onto  
160 individual agar plates ("Plate 2"; PS1-PS15) and allowed to reproduce for two  
161 generations prior to cryopreservation ("Tube 2"). **B)** Replication of lines for  
162 protein/metabolite extraction. Lines (P1, "Tube 2" from [A]) were thawed (plate 3) and  
163 five individuals were picked onto individual agar plates ("Plate 4", Rep1-Rep5) and  
164 propagated by single-worm descent for another generation (F1.1, "Plate 5"). F1.1  
165 worms were allowed to reproduce for two generations (F2.1, F3.1), and when the plates  
166 contained gravid worms (F3.1) and eggs (F4.1) they were bleached. The resulting eggs  
167 (F4.1) were transferred to a new plate ("Plate 6") and allowed to hatch and grow to the  
168 young adult stage, at which time protein and metabolites were extracted. The timeline at  
169 the top represents the number of generations of reproduction of PS lines subsequent to  
170 divergence of the lines from the common ancestor.

171 P1 plate onto a 100mm plate (F1.1 in Figure 3B). The F1 worms were grown for ten days (two  
172 generations, F2.1 and F3.1 in Figure 3B) of self-replication to ensure that F3 worms were gravid  
173 and there were abundant eggs on the plate (F4.1 in Figure 3B). Worms were washed from the  
174 plate and "bleached" in an NaOH and sodium hypochlorite solution (SULSTON AND HODGKIN  
175 1988) .This process kills all hatched worms by breaking down their cuticle and leaves only eggs  
176 (F4.1 in Figure 3B), resulting in a population that is closely synchronized in developmental  
177 timing. Once F4 worms had been bleached, hatched, and reached the L4 stage, they were  
178 washed five times in ion-free NGM buffer, mixed with protease inhibitor cocktail, and  
179 homogenized via sonication (TANG AND CHOE 2015). Homogenized samples were centrifuged,  
180 and the protein-rich supernatant was distributed equally into six cryovials and stored at -80 C°.

181 All lines, both MA and PS, were labeled with their true line number until  
182 cryopreservation, at which time each replicate was assigned a random number to obscure  
183 sample identity. This resulted in six identical sets of 290 samples to be tested. One replicate of  
184 one PS line and all replicates of MA line 571 were lost during protein extraction, resulting in a  
185 total of 284 samples from 15 PS and 42 MA lines.

186

### 187 **Estimating Total Soluble Protein via Bicinchoninic Acid Assay (BCA)**

188 We used total soluble protein as a proxy for the number of individual worms in a sample. To  
189 quantify the total soluble protein in each sample we used a bicinchoninic acid assay (BCA)  
190 following the protocol from Thermo Scientific (Pierce BCA Protein Assay Kit #23225). Briefly, a  
191 set of known concentrations of bovine serum albumin is used to generate a standard curve  
192 against which one can estimate the concentrations of unknown protein samples. A total of 13  
193 BC assays were performed, each with its own set of standards.

194

### 195 **Enzyme activity assays:**

196 (i) *Adenosine kinase (ADK)*

197 Adenosine kinase (ADK) activity was measured using the Novocib PRECISE ADK assay kit  
198 (Novocib, Ref #K0507-01). This assay measures ADK activity based on the production on  
199  $\text{NADH}_2$ , which is generated by the dephosphorylation of ATP by ADK. To ensure that ADK  
200 activity is not limited by available ATP, an excess of human ATP was added to each sample.  
201 Absorbance at 340nm was measured at one-minute intervals for 40 minutes. The slope of the  
202 line over the linear phase quantifies the activity of each sample in units of absorption per  
203 minute. A set of positive (human ADK, provided in the kit) and negative (no enzyme) controls  
204 were included with the unknown samples in each assay plate and used to quantify assay  
205 quality, per the manufacturer's instructions. Thirty of the 290 samples were not included in the  
206 ADK activity assay. All samples that were run included at least two technical replicates, in which  
207 extracts from a sample were split and assayed independently.

208 *(ii) Adenosine deaminase (ADA):*

209 ADA activity was measured using Abcam's Adenosine Deaminase (ADA) Activity Assay Kit  
210 (Abcam, ab21193). This kit utilizes an ADA developer and converter which react with inosine  
211 formed from the breakdown of adenosine by ADA to produce uric acid. Uric acid concentration  
212 is then measured via absorbance at 293nm once a minute for 45 minutes. Each kit is run with a  
213 set of known concentration standards that are used to generate a standard curve. The quantity  
214 of uric acid was then measured and used to calculate the activity of the ADA in a given sample  
215 in units of  $\text{nmol}/\text{min}/\mu\text{g}$ , following the manufacturer's instructions.

216 ADA activity was assayed in six 96-well plates, each including a positive (manufacturer  
217 supplied ADA) and negative (no sample) control. For one assay plate, the highest concentration  
218 standard had an unusually low reading; we therefore omitted this point from the standard curve  
219 for this assay. Omission of that point had no effect on the interpretation of the data because all  
220 unknown samples had absorbance values greater than the second lowest standard. All of the  
221 290 samples had maximum measured activity well below the highest concentration standard.  
222 Four samples with erratic absorption readings were omitted from further analyses.

223

224 **Enzyme concentration:**

225 Enzyme concentrations were estimated by Western blot (WB) (Supplemental Figure S1).

226 Extracted samples were denatured in 2X Laemmli buffer (with  $\beta$ -mercaptoethanol) and boiled at

227 70° for 10 minutes. Each gel lane was loaded with 7ug of total soluble protein calculated from

228 the BCA data (Bio-Rad 10% polyacrylamide gel, product #4561033). Each blot included eight

229 samples, a DNA-ladder and an internal control standard consisting of a homogenate of *C.*

230 *elegans*. We used the Trans-Blot Turbo Transfer System (Bio-Rad, #1704156) to transfer

231 proteins separated by gel electrophoresis onto blotting paper. After the primary (enzyme-

232 specific) and secondary (visualization) antibodies were bound (antibodies described below),

233 antibody binding was visualized using the Pierce ECL Western Blotting Substrate (Thermo

234 Fischer Product # 32106). Brightness of each band relative to the internal control was estimated

235 using ImageJ image-analysis software and used as a proxy for enzyme concentration. 246 of

236 the 284 samples contained sufficient protein to be visualized by Western Blot.

237 The concentration of tubulin in a sample is commonly used as a loading control, and we

238 quantified tubulin in each sample for both enzymes (Tubulin antibody DSHB, E7). However,

239 tubulin concentration was not independent of treatment (MA vs. PS), so we treat it as an

240 experimental trait rather than a control (see Results).

241 *(i) ADK concentration*

242 The antibody used was Abcam's Anti-ADK antibody – C-terminal (Abcam, ab226187), which

243 was designed and tested in mouse and humans and which is homologous with the *C. elegans*

244 ADK protein, R07H5.8 .The assay resulted in multiple binding sites, with distinct bands at

245 ~100kd, ~37kd, ~25kd, and ~18kd (Supplemental Figure S2). To determine which of these

246 binding sites represented the *C. elegans* ADK, samples of each band were extracted from the

247 gel and analyzed using protein mass spectroscopy. Results were then analyzed using Scaffold

248 4; only the sample at ~37kd contained the worm ADK homolog (R07H5.8, molecular weight =  
249 37.5 kd; Wormbase). 112 of the 246 samples did not contain sufficient ADK to be measured by  
250 Western blot. These lines were tested in duplicate and failed to produce ADK bands both times,  
251 so the low concentration of ADK is presumably a true property of the sample and not an  
252 experimental artifact.

253 (ii) *Adenosine deaminase (ADA) concentration:*

254 The primary anti-body used was Abcam's Anti-ADAT2 antibody (Abcam, ab122280). This  
255 antibody is homologous with the *C. elegans* ADA protein ADR-1 which is known to code for  
256 ADA in worms (Wormbase). The assay resulted in multiple binding sites, with distinct bands at  
257 ~100kd, ~60kd, and ~22kd (Supplemental Figure S3). Samples of each band were extracted  
258 from the gel and analyzed using protein mass spectroscopy as for ADK. The band at ~100kd  
259 contained the worm ADA homolog ADR-1, isoform D (101.8kd). 202 of the 246 samples  
260 contained ADA in sufficient concentration to be quantified by Western blotting.

261

## 262 **Metabolomics:**

263 To assess the relationship between enzyme concentration and activity and the concentration of  
264 their associated metabolites, we targeted four metabolites in the adenosine metabolic pathway:  
265 adenosine, inosine, AMP, and adenine. Several other metabolites not in the adenosine pathway  
266 were also measured, including GMP, guanine, guanosine, hypoxanthine, xanthine, and uric acid  
267 because they were part of a routine panel that included the metabolites of interest. Metabolite  
268 quantification was performed using liquid chromatography/mass spectroscopy (LC-MS),  
269 calibrated with known standards at the Southeast Center for Integrated Metabolomics at UF.

270 Internal standards were prepared as follows: Adenine-<sup>15</sup>N<sub>2</sub> (Cat #A2880477), guanine-  
271 4,5-<sup>13</sup>C<sub>2</sub> 7-<sup>15</sup>N (Cat #G836003), hypoxanthine-<sup>13</sup>C<sub>2</sub> <sup>15</sup>N (Cat #H998504) and xanthine-  
272 <sup>13</sup>C <sup>15</sup>N<sub>2</sub> (Cat #X499954) were purchased from Toronto Research Chemicals (Toronto, ON).  
273 Adenosine-<sup>15</sup>N<sub>5</sub> 5'-monophosphate (Cat #662658), adenosine-<sup>15</sup>N<sub>5</sub> 5'-triphosphate (Cat

274 #707783), guanosine-<sup>15</sup>N<sub>5</sub> 5'-monophosphate (Cat #900380) and guanosine-<sup>13</sup>C<sub>10</sub> 5'-  
275 triphosphate (Cat #710687) were purchased from Sigma-Aldrich (St. Louis, MO). The labeled  
276 adenosine and guanosine triphosphates were dephosphorylated with alkaline phosphatase  
277 (Promega, Madison, WI; Cat #M1821) according to the manufacturer's directions to produce the  
278 corresponding labelled nucleosides. Uric acid-<sup>13</sup>C <sup>18</sup>O was synthesized from urea-<sup>13</sup>C <sup>18</sup>O  
279 (Cambridge Isotopes, Andover, MA; Cat #COLM-4861) and 5,6-diaminouracil sulfate (Sigma-  
280 Aldrich; Cat #D15103) according to methods of Cavalieri et al (CAVALIERI *et al.* 1948).

281 For the purine assay, internal standard (10µl) was added to 50µl worm homogenate and  
282 acetonitrile (100µl) was added to precipitate proteins for LC-MS/MS analysis. Samples were  
283 chromatographed on a Waters Cortecs UPLC HILIC column (2.1 x 150 mm, 1.6µm) eluted with  
284 an acetonitrile-water gradient: Buffer A) 5 mmol/L ammonium acetate and 0.1% acetic acid in  
285 acetonitrile: water (:: 98: 2); Buffer B) 10 mmol/L ammonium formate and 0.5% formic acid in  
286 water. Mass spectrometric detection was on a Bruker EvoQ Elite MS/MS in positive ion mode,  
287 using heated electrospray ionization.

288 Stock solutions of the purines analyzed were prepared from authentic standards, and  
289 their concentrations determined by absorbance (UMBREIT *et al.* 1960). The stock solutions were  
290 then mixed to give an appropriate working standard, which was then serially diluted to produce  
291 standard curves. Peak area ratios were calculated by dividing the metabolite peak area by the  
292 peak area of its isotopically labeled internal standard. Metabolite concentrations were calculated  
293 by comparing these peak area ratios to the standard curves.

294

## 295 **Data Analysis:**

### 296 *(i) Estimation of mutational parameters*

297 To quantify the cumulative effects of mutation on individual traits, we calculated the per-  
298 generation change in the trait mean ( $\Delta M$ , the "mutational bias") and the per-generation rate of  
299 increase in genetic variance ( $V_M$ , the "mutational variance"). Mutational bias is calculated as:



300 
$$\Delta M = \frac{\bar{z}_{MA} - \bar{z}_0}{t\bar{z}_0}$$

301 where  $z_{MA}$  and  $z_0$  are the means of the MA lines and the G0 PS lines, respectively, and  $t$  is the  
302 number of generations of MA ( $t=250$ ) (LYNCH AND WALSH 1998).

303 The mutational variance ( $V_M$ ) is calculated as:

304 
$$V_M = \frac{V_{L,MA} - V_{L,0}}{2t}$$

305 where  $V_{L,MA}$  is the among-line variance of the MA lines,  $V_{L,0}$  is the among-line variance of the PS  
306 lines, and  $t$  is the number of generations of MA. The among-line variance of the PS lines  
307 includes the effects of any residual segregating genetic variance, but also heritable epigenetic  
308 effects and the heritable effects of genotype-environment correlation (LYNCH 1985).

309 The mutational covariance between traits ( $COV_M$ ) is estimated analogously to  $V_M$ , with  
310 the among-line components of variance ( $V_L$ ) replaced with the among-line components of  
311 covariance (i.e., the off-diagonal elements in the variance-covariance matrix).

312 *(ii) Statistical analyses*

313 Our primary interest is in the two enzymes, ADA and ADK. The enzyme activity assays  
314 measure the composite effects of enzyme activity *per se* (i.e., the inherent kinetic properties of  
315 the protein) and the concentration of the enzyme in the sample. For a given sample, the rate at  
316 which substrate is converted to product depends on both the amount and the inherent activity of  
317 the enzyme present. Because we have an independent measure of the amount of enzyme  
318 present in the sample (from the Western blots), we can statistically partition the effects of  
319 inherent activity from those of concentration by including enzyme concentration as a covariate in  
320 a general linear model (GLM). The concentration of protein measured in the Western blot is  
321 standardized by the total protein in the sample, so enzyme activity also needs to be  
322 standardized relative to the total protein in the sample, which can be similarly included in a  
323 GLM. The ADA activity assay includes total protein in the calculation of activity, so total protein  
324 is not included in the GLM. The full GLM can be written as:

325 
$$y_{ijkl} = \mu + c_i + p_i + b_j + a_k + L_{lj} + \varepsilon_{ijkl},$$

326 where  $y_{ijkl}$  is the measured activity of the enzyme in sample  $i$ ,  $\mu$  is the overall mean,  $c_i$  is the  
327 effect of the concentration of the enzyme in sample  $i$  (estimated from the Western blot of the  
328 same sample),  $p_i$  is the total protein concentration in sample  $i$ ,  $b_j$  is the random effect of assay  
329 block  $j$ ,  $a_k$  is the fixed effect of MA group  $k$  (MA or PS),  $L_{lj}$  is the random effect of line  $l$  given MA  
330 group  $k$ , and  $\varepsilon_{ijkl}$  is the residual effect. Variance components ( $V_L$  and  $V_E$ ) and their standard  
331 errors were estimated separately for each MA treatment group by restricted maximum likelihood  
332 (REML), with degrees of freedom determined by the Kenward-Roger method (KENWARD AND  
333 ROGER 1997). Significance of the fixed effect of MA treatment group was tested by F-test on  
334 Type III sums of squares.  $\Delta M$  was calculated from mean values of the two groups estimated by  
335 least squares. Model analysis was performed using the lme4 package in R ((BATES *et al.* 2015).

336 Protein concentrations (ADA, ADK, tubulin) were calculated relative to a predetermined  
337 amount of total protein (see section V above). Mutational statistics for protein concentrations  
338 were calculated from the same linear model as above without the covariates. Protein  
339 concentration data were log-transformed to meet the assumptions of the GLM, and statistical  
340 inferences are based on the transformed data. Mutational statistics are reported on the  
341 untransformed scale.

342 Metabolite concentrations were normalized relative to an internal standard. Mutational  
343 statistics were estimated from the same linear model as above, with total protein included as a  
344 covariate.

345 Among-line correlations were estimated from pairwise correlations of line means, using  
346 the R package `corr.test` (REVELLA 2019). Correlations of line means were used rather than  
347 among-line components of covariance because some analyses failed to converge. Five of the  
348 57 lines were excluded from the analysis due to missing data. Trait values were standardized  
349 relative to the G0 mean across all PS lines.

350

351  
352  
353  
354  
355  
356  
357  
358  
359  
360  
361  
362  
363  
364  
365  
366  
367  
368  
369  
370  
371  
372  
373  
374  
375  
376

## RESULTS

### **Per-generation change in trait means ( $\Delta M$ ):**

Of the seventeen traits, four declined significantly over the course of 250 generations of MA (i.e.,  $\Delta M < 0$ ), two increased significantly, and the remainder did not change significantly (Table 1). Of the traits that did not change significantly, the point estimate of  $\Delta M$  for ADK concentration was the largest of any trait, but ADK concentration also had the largest sampling variance in both MA and PS lines. Mean total protein concentration, by which the other trait values were standardized, was nearly identical in the G0 ancestor and in the MA lines. The close concordance in the average amount of total protein in a sample indicates that the average number of worms in a sample did not differ consistently between ancestor and MA lines. A caveat is in order, however. Although samples were synchronized by bleaching and were cultured to the same qualitative stage of development ("a few" eggs were present on the plate), subtle differences in the distributions of developmental stages may exist at any hierarchical level in the experiment (PS vs. MA; among lines; among replicates within a line). It is known that there are consistent changes in the genome-wide transcriptional profile over the course of a few hours of development (FRANCESCONI AND LEHNER 2014; ZALTS AND YANAI 2017), and there is reason to expect that changes in metabolite levels would change at least as fast. implies, however, that the measured output of the reaction depends on factors other than the enzyme itself, because in the PS lines the protein sequence is presumably identical in all samples (transcriptional and translational errors notwithstanding).

Unexpectedly, the mean (normalized) concentration of tubulin decreased with MA. Tubulin is commonly included as a quantification control in studies of enzyme activity (RYBAK-WOLF *et al.* 2014; DYSHLOVOY *et al.* 2017), although it is notoriously variable (FERGUSON *et al.* 2005; YU *et al.* 2011; EATON *et al.* 2013; LEE *et al.* 2016; MORITZ 2017). Tubulin concentration was separately quantified in the assays of ADA and ADK concentration, and the estimates of the mean decrease were nearly identical (Table 1). There is not an obvious explanation for why

| <i>Trait</i>        | $M_{MA}$              | $M_0$                  | $\Delta M$                        |
|---------------------|-----------------------|------------------------|-----------------------------------|
| ADA Activity        | 0.01 (0.01, 1.20E-02) | 0.004 (0.003, 4.3E-03) | <b>0.0085</b> (0.007, 0.0102)     |
| ADK Activity        | 0.02 (0.02, 2.27E-02) | 0.02 (0.02, 2.58E-02)  | -0.0003 (-0.0009, 0.0005)         |
| ADA Concentration   | 0.27 (0.19, 0.36)     | 0.44 (0.25, 0.65)      | -0.0014 (-0.0026, 0.0006)         |
| ADK Concentration   | 3.10 (1.31, 5.32)     | 0.78 (0.41, 1.16)      | <b>0.0131</b> (0.0023, 0.032)     |
| Tubulin Conc. (ADA) | 0.13 (0.11, 0.15)     | 0.17 (0.14, 0.19)      | <b>-0.0009</b> (-0.0014, -0.0002) |
| Tubulin Conc. (ADK) | 0.14 (0.12, 0.17)     | 0.18 (0.14, 0.19)      | -0.001 (-0.0024, 0.001)           |
| Total Protein       | 0.70 (0.64, 0.76)     | 0.70 (0.63, 0.77)      | 0.0000215 (-0.0005, 0.0006)       |
| AMP                 | 14.40 (12.39, 16.50)  | 21.24 (16.41, 26.19)   | <b>-0.0012</b> (-0.0019, -0.0004) |
| Adenine             | 0.49 (0.38, 0.61)     | 0.45 (0.32, 0.61)      | 0.0004 (-0.011, 0.0025)           |
| Adenosine           | 2.77 (1.25, 4.75)     | 6.52 (1.70, 12.71)     | -0.0018 (-0.0034, 0.0029)         |
| GMP                 | 4.69 (3.71, 5.97)     | 7.17 (5.56, 9.05)      | <b>-0.0013</b> (-0.0021, -0.0002) |
| Guanine             | 2.59 (2.08, 3.24)     | 3.47 (2.40, 4.57)      | -0.0009 (-0.0019, 0.0006)         |
| Guanosine           | 3.19 (1.45, 5.66)     | 4.84 (1.99, 8.44)      | -0.001 (-0.003, 0.0033)           |
| Hypoxanthine        | 6.45 (5.06, 7.91)     | 7.38 (5.36, 9.56)      | -0.0004 (-0.0015, 0.0011)         |
| Inosine             | 1.73 (1.12, 2.43)     | 2.59 (1.29, 4.39)      | -0.0011 (-0.0027, 0.0018)         |
| Uric Acid           | 22.98 (17.84, 29.18)  | 26.06 (19.60, 35.08)   | -0.0004 (-0.0016, 0.0011)         |
| Xanthine            | 4.71 (3.93, 5.59)     | 6.73 (5.30, 8.42)      | <b>-0.0012</b> (-0.0019, -0.0003) |

377 **Table 1.** Means. Bold values of  $\Delta M$  are significantly different from zero ( $P < 0.05$ ); empirical 95% bootstrap confidence  
378 intervals in parentheses. See Methods for details of the estimation of trait means.

379 the concentration of tubulin should decrease relative to total protein in MA lines. A subtle, but  
380 consistent, difference in the distribution of developmental stages, perhaps associated with the  
381 cell cycle, seems as likely as any.

382

### 383 **Mutational variance (or the Lack Thereof):**

384 As mutations accumulate over time, MA lines are expected to diverge in trait values, leading to  
385 a consistent, long-term increase in the among-line component of variance ( $V_L$ ). Scaled per-  
386 generation, this increase is the "mutational variance",  $V_M$  (LYNCH AND WALSH 1998, p. 330). For  
387 various reasons, however, some fraction of the among-line variance may be due to factors other  
388 than the accumulation of new mutations. Possible reasons include residual segregating  
389 variation in the ancestor of the MA lines, genotype-environment correlations (sometimes  
390 unknown or unknowable), and heritable epigenetic effects (REHAVI AND LEV 2017; PEREZ AND  
391 LEHNER 2019). To account for potential non-genetic contributions to the among-line variance, it  
392 is necessary to include a set of "pseudolines" (PS) of the ancestor, which are treated both  
393 experimentally and statistically as if they were MA lines (LYNCH 1985; TEOTÓNIO *et al.* 2017).

394 To our considerable surprise, for most traits the among-line variance of the PS lines is of  
395 the same order of magnitude as that of the MA lines (Table 2). We report two different  
396 standardizations of  $V_M$ . First, the difference in the among-line variance between the PS and MA  
397 lines is divided by the square of the mean of the PS lines ( $V_{M,0}$ ); this is equivalent to the squared  
398 coefficient of variation, standardized by the ancestral mean. This quantity is often called the  
399 "evolvability" (HOULE 1992), and is the customary way of scaling mutational variance. However,  
400 if the trait mean changes over the course of evolution, scaling the MA lines by the ancestral  
401 mean will underestimate the true mutational variance if mutational effects are multiplicative (i.e.,  
402 the CV is constant; FRY AND HEINSOHN 2002; BAER *et al.* 2006). Because several traits changed  
403 significantly, we also report  $V_M$  scaled by the group mean ( $V_{M,MA}$ ; i.e., PS lines are scaled by the  
404 square of the PS mean and MA lines are scaled by the square of the MA mean). When scaled

| <i>Trait</i>        | $V_{L,MA}$                      | $V_{L,PS}$                     | $V_{M,0}$                             | $V_{M,MA}$                            | $V_{E,MA}$                       | $V_{E,PS}$                       |
|---------------------|---------------------------------|--------------------------------|---------------------------------------|---------------------------------------|----------------------------------|----------------------------------|
| ADA Activity        | 1.41E-07<br>(0, 5.07E-07)       | 3.332E-09<br>(0, 2.18E-08)     | 2.18E-08<br>(0, 8.51E-08)             | <b>7.18E-08</b><br>(0, 2.64E-07)      | 3.83E-06<br>(2.91E-06, 4.85E-06) | 6.49E-06<br>(3.95E-06, 9.16E-06) |
| ADK Activity        | 3.86E-10<br>(0, 4.99 E-09)      | 6.277<br>(0, 3.19E-07)         | 5.99E-09<br>(0, 0.00E+00)             | 0<br>(0, 0.00E+00)                    | 5.95E-07<br>(4.28E-07, 7.78E-07) | 7.66E-07<br>(4.11E-07, 1.18E-06) |
| ADA Concentration   | <b>0.053</b><br>(0.013, 0.103)  | <b>0.096</b><br>(0.007, 0.186) | 4.25E-05<br>(0, 0.0003)               | 0<br>(0, 0.0004)                      | 0.05<br>(0.03, 0.08)             | 0.05<br>(0.02, 0.09)             |
| ADK Concentration   | 3.239<br>(0, 8.064)             | 0.0412<br>(0,0.133)            | 0.002<br>(0, 0.006)                   | 0.008<br>(0, 0,027)                   | 77.94<br>(4.68, 192.73)          | 0.97<br>(0.16, 2.26)             |
| Tubulin Conc. (ADA) | 0.0007<br>(0, 0.002)            | 0.0004<br>(0, 0.003)           | 5.76E-06<br>(0, 2.97E-05)             | 3.38E-06<br>(0, 2.27E-05)             | 0.007<br>(0.004, 0.01)           | 0.008<br>(0.005, 0.015)          |
| Tubulin Conc. (ADK) | <b>0.007</b><br>(0.0003, 0.021) | 0.000003309<br>(0,0)           | <b>9.63E-05</b><br>(5.87E-06, 0.003)  | <b>8.06E-05</b><br>(4.33E-06, 0.0002) | 0.010<br>(0.005, 0.015)          | 0.014<br>(0.008, 0.021)          |
| Total Protein       | <b>0.023</b><br>(0.010, 0.037)  | 0<br>(0, 0)                    | <b>6.68E-05</b><br>(3.02E-05, 0.0001) | <b>6.74E-05</b><br>(2.9E-05, 0.0001)  | 0.06<br>(0.04, 0.08)             | 0.09<br>(0.05, 0.13)             |
| AMP                 | <b>16.11</b><br>(7.642, 27.21)  | 10.89<br>(0, 24.03)            | 0.001<br>(0,0.003)                    | 0.0005<br>(0, 0.002)                  | 27.76<br>(17.89, 39.55)          | 49.29<br>(30.57, 69.71)          |
| Adenine             | <b>0.013</b><br>(0.005, 0.021)  | 0.006<br>(0, 0.016)            | 2.33E-05<br>(0, 7.19E-05)             | 2.91E-05<br>(0, 9.06E-05)             | 0.04<br>(0.03, 0.06)             | 0.08<br>(0.02, 0.16)             |
| Adenosine           | <b>22.96</b><br>(1.043, 47.29)  | <b>63.77</b><br>(0.117, 137.8) | 0<br>(0, 0.018)                       | 0<br>(0, 0.026)                       | 6.84<br>(0.73, 15.05)            | 66.03<br>(9.58, 130.22)          |
| GMP                 | <b>3.322</b><br>(0.157, 8.804)  | 1.237<br>(0, 3.021)            | 0.001<br>(0, 0.003)                   | 0.0006<br>(0, 0,002)                  | 6.88<br>(3.98, 10.23)            | 9.25<br>(4.74, 14,58)            |
| Guanine             | <b>0.792</b><br>(0.135, 1.829)  | <b>0.967</b><br>(0.291, 1.670) | 1.26E-05<br>(0, 0.001)                | 0<br>(0, 0,0007)                      | 0.89<br>(0.61, 1.21)             | 1.54<br>(0.81, 2.48)             |
| Guanosine           | <b>16.54</b><br>(2.314, 35.09)  | <b>24.52</b><br>(2.771, 53.69) | 1.92E-05<br>(0, 0.008)                | 0<br>(0, 0,016)                       | 9.34<br>(1.21, 20.93)            | 15.36<br>(1.98, 30.91)           |
| Hypoxanthine        | <b>5.518</b><br>(1.482, 10.79)  | 4.554<br>(0, 12.12)            | 0.0005<br>(0, 0.003)                  | 0.0003<br>(0, 0,003)                  | 17.22<br>(11.45, 23.32)          | 20.75<br>(11.35, 31.38)          |
| Inosine             | <b>2.759</b><br>(0.546, 4.835)  | <b>5.293</b><br>(0.034, 9.856) | 0<br>(0, 0.004)                       | 0<br>(0, 0.005)                       | 2.68<br>(0.61, 5.47)             | 10.28<br>(0.44, 28.20)           |
| Uric Acid           | <b>38.29</b><br>(17.57, 59.97)  | <b>41.94</b><br>(5.871, 99.22) | 0.0003<br>(0, 0.0035)                 | 0<br>(0, 0,004)                       | 83.36<br>(48.54, 126.80)         | 81.95<br>(39.29, 132.79)         |

|          |                                |                     |                      |                      |                      |                        |
|----------|--------------------------------|---------------------|----------------------|----------------------|----------------------|------------------------|
| Xanthine | <b>2.719</b><br>(0.475, 5.329) | 2.039<br>(0, 5.214) | 0.0005<br>(0, 0.002) | 0.0002<br>(0, 0.001) | 6.23<br>(3.61, 9.77) | 11.38<br>(6.09, 17.00) |
|----------|--------------------------------|---------------------|----------------------|----------------------|----------------------|------------------------|

405

406 **Table 2.** Variances. Column headings are:  $V_{L,MA}$ , among-line variance of the MA lines;  $V_{L,PS}$ , among-line variance of the  
407 PL lines;  $V_{M,0}$ , the mutational variance standardized by the ancestral mean;  $V_{M,MA}$ , the mutational variance standardized  
408 by the mean of the group;  $V_{E,MA}$ , the residual (within-line) variance of the MA lines;  $V_{E,PS}$ , the residual (within-line) variance  
409 of the PS lines. Values of  $V_L$  and  $V_M$  in bold are significantly greater than zero; empirical 95% bootstrap confidence  
410 intervals are shown in parentheses. See Methods for details of the estimation of variance components.

411 by the ancestral mean ( $V_{M,0}$ ), 3/17 traits have significant mutational variance (tubulin  
412 concentration in the ADK assay, total protein, and ADA activity). When scaled by the group  
413 mean ( $V_{M,MA}$ ), only tubulin concentration in the ADK assay and total protein remain significant.  
414 Importantly, the general lack of mutational variance is not because there is little among-line  
415 variance in the MA lines; in 13/17 cases  $V_L$  in the MA lines is significantly greater than zero.

416 Conceivably, technical variance associated with enzyme or metabolite assays could  
417 swamp biological variation and lead to a spurious partitioning of variance. However, several  
418 lines of evidence suggest this is not the cause of the substantial variance among PS lines.  
419 Technical replicates (i.e., samples of extracted material were split and assayed independently)  
420 for some of the 290 biological samples were run for ADK activity, ADK concentration, and  
421 tubulin concentration (in the ADK assay). In every case, the among-technical replicate variance  
422 was much less than the within-line variance (Supplemental Figure S4). Based on previous  
423 experience with our metabolomics screen, technical replicate variance for the metabolic pools is  
424 expected to be less than 5% for all metabolites except for GMP and uric acid which are  
425 expected to be less than 10% (Eoin Quinlivan, Southeast Center for Integrative Metabolomics,  
426 personal communication).

427 It is also extremely unlikely that residual segregating genetic variance could explain the  
428 similar magnitudes of the among-line variance in the PS and MA lines. First, any residual  
429 genetic variation would be equivalently partitioned among PS lines and MA lines, and would  
430 contribute equally (on average, sampling variance notwithstanding). The MA lines were initiated  
431 in March, 2001, at which time the G0 ancestor was expanded to large population size (three  
432 generations) and cryopreserved. Over the intervening 16 years, the ancestor has been thawed,  
433 re-expanded, and re-frozen several times. We do not know exactly how many times the  
434 ancestor has been thawed/expanded/re-frozen, but five is a conservative (high) estimate. If we  
435 assume that each expansion takes three generations and there have been five such



436 expansions, then any two PS lines will have diverged for  $2 \times 5 \times 3 = 30$  generations. In contrast,  
437 any two MA lines have diverged for  $2 \times (250 + 3) \approx 500$  generations.

438         If technical and/or residual genetic variation cannot explain the among-line variance of  
439 PS lines, the most likely remaining possibility is heritable epigenetic effects. We cannot rule out  
440 a vertically-transmitted pathogen, such as a virus or an intracellular parasite, e.g., microsporidia.  
441 However, there is no reason to expect variation in such a pathogen in long-term laboratory lines,  
442 whereas there is abundant evidence for heritable epigenetic effects in *C. elegans*. Data were  
443 collected on the F4 descendants of the most recent common ancestor of a line (Figure 3B;  
444 Supplementary Table 1), which means that any non-genetic short-term heritable effects that are  
445 common to a line had to have been maintained for at least four generations, and perhaps since  
446 the founder of the PS line six generations back (Figure 3A). Thus, effects common to a line  
447 meet the definition of "transgenerational" effects (i.e. passed down to at least the F3, RECHAVI  
448 AND LEV 2017). We return to the topic of epigenetic inheritance in the Discussion.

449

#### 450 **Among-line correlations**

451 The absence of significant mutational variance precludes estimation of mutational covariances,  
452 which was one of the underlying motivations of this study. However, because there is  
453 significant among-line variance for most traits in both the PS and MA lines, it is meaningful to  
454 investigate the among-line correlations over the set of all lines (Figure 4). Note that these are  
455 not phenotypic correlations in the usual sense. Presumably, the among-line correlations reflect  
456 what might be thought of as epi-pleiotropy – the effects of an epigenetic variant (whatever it may  
457 be) on multiple traits – as well as the cumulative pleiotropic effects of new mutations.

458         There were significant positive correlations between the concentration of ADA and its  
459 substrate (adenosine;  $r = 0.57$ ,  $p < 0.0001$ ) and product (inosine;  $r = 0.63$ ,  $p < 0.0001$ ), and  
460 between the pools of adenosine and inosine ( $r = 0.59$ ,  $p < 0.0001$ ). ADK concentration was  
461 positively correlated with the concentration of its substrate (adenosine;  $r = 0.32$ ,  $p < 0.0002$ ), but

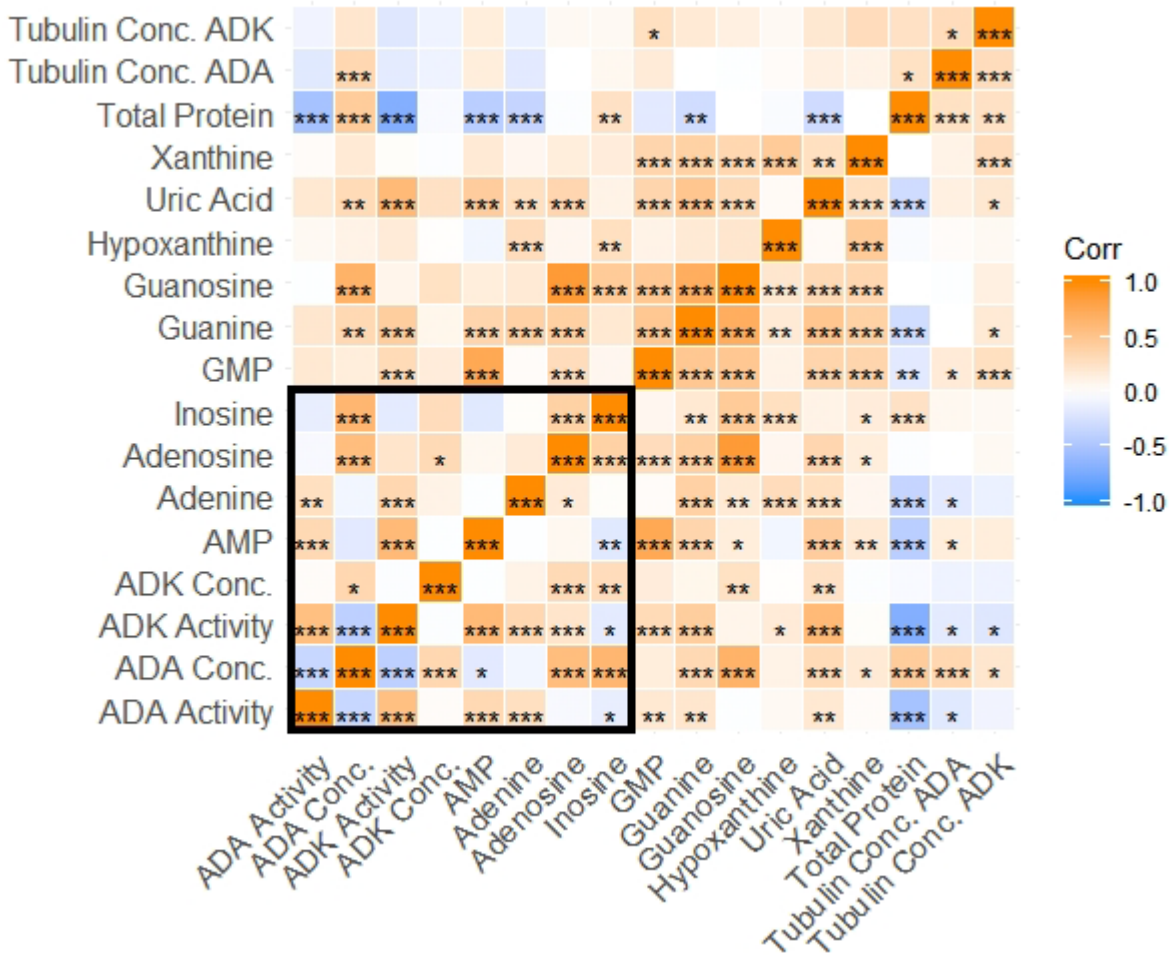

462

463

464 **Figure 4.** Heatmap of Pearson's correlations between traits. Correlations within the  
 465 black box are those traits within the adenosine pathway. Significance levels are shown

466 as follows: \*\*\* = p < 0.001, \*\* = p < 0.01, \* = p < 0.05.

467 uncorrelated with its product, AMP. Pools of AMP and adenosine were uncorrelated. We were  
468 unable to measure the activity or concentration of adenosine phosphoribosyltransferase  
469 (APRT), which converts Adenine to AMP.

470

## 471 DISCUSSION

472 We are confronted with two results which appear contradictory. First, for some traits the means  
473 change significantly over the course of ~250 generations of evolution under MA conditions (4/17  
474 decline, 2/17 increase). However, the mutational variance ( $V_M$ ) does not differ significantly from  
475 zero for any trait. That trait means change with MA is not unexpected, and there is no *a priori*  
476 reason to expect every trait to change in the same direction; metabolic traits are not fitness  
477 components *per se*. The average absolute  $\Delta M$  is on the order of 0.1%/generation, consistent  
478 with a wide variety of traits in these lines (summarized in Supplemental Table S2 of DAVIES et  
479 al. (2016)). Notably, the activity of the two enzymes we investigated remained either  
480 unchanged (ADK) or changed only very slightly (ADA), consistent with the coding sequence of  
481 an enzyme providing a small mutational target.

482         Conversely, the general lack of significant mutational variance is unexpected, especially  
483 because several traits show clear evidence for the cumulative effects of mutation on the trait  
484 mean. The lack of mutational variation is not because there is no variation between MA lines.  
485 The cumulative effects of mutation were not swamped by technical or microenvironmental noise  
486 (i.e., residual variance;  $V_E$  in the parlance of quantitative genetics). For most traits, the among-  
487 line variance of the MA lines is significantly greater than zero (Table 2). Rather, the variance  
488 among pseudolines of the ancestral control of similar magnitude to the variance among MA  
489 lines. Again, enzyme activity is an exception; there is no variance in enzyme activity among MA  
490 lines or among PS lines, as expected if enzyme activity is primarily a function of the protein itself  
491 and the coding sequence of the gene remains unmutated.

492           At this point, we must confront an uncomfortable truth. We chose the adenosine  
493 metabolism pathway for further scrutiny based on two findings of DAVIES et al. (2016). In that  
494 study, mean adenosine concentration *increased* by over 4% per generation – one of the largest  
495 values of  $\Delta M$  reported for any trait in any organism – whereas in this study we found a slight  
496 (non-significant) decline in mean adenosine concentration of about 0.2%/generation *in the same*  
497 *set of MA lines*. Similarly, DAVIES et al. reported a mutational heritability ( $V_M/V_E$ ) for adenosine  
498 concentration of about 0.004/generation – toward the high end of mutational heritabilities  
499 (HOULE *et al.* 1996) – whereas, we found no significant mutational variance. Clearly, the two  
500 studies are at odds: they can't both be right, although they may both be wrong in different ways.  
501 Admittedly, the methods of quantifying metabolite concentration were different in the two  
502 studies; we used LC-MS in this study, whereas DAVIES et al. used GC-MS, but a poor workman  
503 blames his tools.

504           For economic reasons (metabolomics is expensive), DAVIES et al. did not include  
505 pseudolines of the G0 ancestor in their study. As it happens, all but three of the 43 MA lines  
506 included in the DAVIES et al. study had mean adenosine concentrations greater than that of the  
507 G0 ancestor, which was an order of magnitude less than the mean of the MA lines in normalized  
508 units ( $\bar{z}_{MA} = 22.6 \pm 3.4$ ,  $\bar{n} = 3.9$ ;  $z_0 = 2.1 \pm 0.7$ ,  $n = 9$ ; see Figure 1 of DAVIES et al. (2016)). Because  
509  $\Delta M$  is measured relative to the ancestor, if the mean value of the ancestor is atypically small,  
510  $\Delta M$  will be atypically large. We have no reason to doubt the accuracy of the estimate of mean  
511 adenosine concentration of the G0 ancestor in the DAVIES et al. study. 3/43 MA lines had mean  
512 concentrations lower than the ancestor, and another seven MA lines had means less than the  
513 largest of the nine replicates of the ancestor. Moreover, the average metabolite concentration  
514 of the ancestor was not low relative to the MA lines when all 29 metabolites are considered: the  
515 median rank of the ancestor is 34/44 (data from DAVIES et al. (2016) are archived in Dryad, at  
516 <https://datadryad.org/stash/dataset/doi:10.5061/dryad.2dn09>).

517           It is important to carefully consider the differences between the ways the ancestral  
518 controls were treated in the two studies. At the outset of the DAVIES et al. study, in 2009, a  
519 single cryopreserved sample of the ancestor was thawed in the Baer lab (Florida) and plated.  
520 From that plate, a "chunk" containing hundreds of worms was transferred onto another plate  
521 and sent to the Leroi lab in England, at which time worms were washed from the plate and  
522 cryopreserved at  $-80^{\circ}$  C. Later, one tube of the ancestor was thawed and plated onto a 100 mm  
523 plate. When the population on that plate reached high density (2-3 generations), worms were  
524 washed from the plate and "bleached" (SULSTON AND HODGKIN 1988), and surviving L1 larvae  
525 were chunked onto a new plate. From that plate, nine replicate plates were initiated from a  
526 single individual, and the populations grown to high density (2-3 generations) and synchronized  
527 by bleaching. Surviving L1s were plated and grown until worms reached young adulthood, at  
528 which time worms were collected for extraction of metabolites. In this design, the nine replicate  
529 plates are conceptually identical to the five replicates of each MA line, and the among-replicate  
530 (=within-line) variance is the residual variance,  $V_E$ .

531           In this study (depicted in Figure 3A), 15 replicate plates were initiated from a single  
532 individual, grown to high density (two generations), and cryopreserved. These are the 15  
533 ancestral pseudolines (PS). Subsequent to thawing (depicted in Figure 3B), the PS lines were  
534 treated identically to MA lines, with five replicate plates per PS line initiated from a single  
535 individual worm taken from the thawed plate. The replicates then were then propagated to the  
536 F3 descendants of the original founder of the replicate, and their offspring (F4) collected for  
537 analysis. The variation among replicates is the residual variance,  $V_E$ . Any effects that are  
538 common to a PS line (i.e., which contribute to  $V_L$ ) must necessarily have been maintained at  
539 least since the replicates diverged from their most recent common ancestor four generations  
540 previously, and potentially for as many as the six generations subsequent to the founding of the  
541 PS lines.

542           We believe the source of the discrepancy in  $\Delta M$  between the two studies is likely the  
543 same as the source of the discrepancy in  $V_M$ : short-term heritable, epigenetic variation. For  
544 example, there is a ~120X difference between the mean adenosine concentrations between the  
545 two most extreme of the 43 MA lines in the DAVIES et al. study. The conventional interpretation  
546 is (and was) that spontaneous mutations accumulated over a couple of hundred generations  
547 can lead to huge differences in metabolite concentrations (and presumably in the concentrations  
548 of other biological molecules). However, there is a ~100X difference in the mean adenosine  
549 concentration between the two most extreme of the PS lines in this study, lines that have  
550 diverged for only a few generations. If the one aliquot of the ancestor sampled in the DAVIES et  
551 al. study just happened by chance to fall in the lower tail of the distribution, voilà:  $\Delta M$  "among  
552 the largest reported for any trait" (quoting DAVIES et al. 2016, p. 2243).

553           Given that the short-term heritability observed here is in fact epigenetic, what might be  
554 the cause(s), both proximate (i.e., mechanistic) and ultimate (e.g., environmental)? There is a  
555 burgeoning literature on heritable epigenetic effects in *C. elegans*, which can have a number of  
556 mechanistic causes, including several varieties of small RNA (RECHAVI AND LEV 2017), histone  
557 modifications (FURUHASHI et al. 2010; RECHTSTEINER et al. 2010; TABUCHI et al. 2018), and  
558 possibly 6-methyl adenine in DNA (GREER et al. 2015). Heritable epigenetic effects have been  
559 shown to affect a wide variety of traits (SCHOTT et al. 2014; DEMOINET et al. 2017; HAN et al.  
560 2017; KISHIMOTO et al. 2017), and in some cases have been shown to last for tens of  
561 generations (ASHE et al. 2012; RECHAVI AND LEV 2017). Parental age (PEREZ et al. 2017) and  
562 nutrition status (MIERSCH AND DORING 2012; TAUFFENBERGER AND PARKER 2014; JOBSON et al.  
563 2015) are especially well-documented drivers of epigenetic variation and are obvious potential  
564 sources of variation in the experiments reported here.

565           Nailing down the mechanistic cause(s) responsible for the epigenetic variation inferred  
566 here would be both very interesting and very challenging, but it is beyond the scope of this  
567 study. To do so would involve a multi-omics study, including whole-genome transcriptomics,

568 metabolomics, proteomics, and ChIP-seq with a smorgasbord of histone-tag antibodies to  
569 determine the underlying chromatin status. However, while we do not know the mechanistic  
570 underpinning(s) of the epigenetic variation among the ancestral pseudolines, the fact that we  
571 detected so much epigenetic variation suggests that it is an important consideration in mutation  
572 accumulation studies, and more generally, in any quantitative genetic study in which phenotypic  
573 variance is partitioned within and among genotypes.

574 In the only study comparable to this one, CLARK *et al.* (1995, Table 3) found significant  
575 mutational heritability for the activity of 8/12 metabolic enzymes in a set of *Drosophila*  
576 *melanogaster* MA lines that had evolved under MA conditions for 44 generations. However, their  
577 assay conflates variation in enzyme activity *per se* and variation in enzyme concentration into  
578 the composite category "enzyme activity" (normalized by body weight and total protein  
579 concentration), without correcting for enzyme concentration. The *Drosophila melanogaster*  
580 genomic mutation rate is perhaps 3X greater than that of *C. elegans* (SHARP AND AGRAWAL  
581 2012; SCHRIDER *et al.* 2013), which suggests that after 44 generations of MA, a *Drosophila* MA  
582 line would have accumulated approximately half as many mutations as one of our *C. elegans*  
583 MA lines. Contrary to our expectation based on the preceding evidence, neither of the two  
584 metabolic enzymes we assayed (ADA and ADK) exhibited among-line variance for activity *per*  
585 *se* in either the MA lines or the PS lines. Thus, for those traits, we cannot attribute the absence  
586 of  $V_M$  to the confounding effects of among-line variance in the ancestor. It is interesting that the  
587 activity of these two enzymes is similarly unperturbed by both mutation and epigenetic factors.  
588 However, neither ADA nor ADK was included in the CLARK *et al.* study; it is certainly possible  
589 that had those enzymes been included in that study, they would have fallen in the group of  
590 enzymes without significant  $V_M$ .

591 We conclude with two thoughts. First, for this set of metabolic traits (enzyme activity  
592 notwithstanding), a few generations of short-term heritable (presumably) epigenetic effects  
593 swamp the signal of ~250 generations of accumulated mutations. Perhaps that should not be



594 surprising: it is simply phenotypic plasticity, albeit of a different sort than evolutionary biologists  
595 are used to thinking about. It does strongly suggest, however, that investigators doing MA  
596 experiments need to be especially mindful of how the ancestor is treated. But also, second:  
597 these findings cast the recent increase in human metabolic complex disease in a different light.  
598 Although we remain skeptical of epigenetic variation as a general cause of "missing heritability",  
599 it may be that metabolic traits are particularly susceptible to epigenetic regulation and are  
600 worthy of closer scrutiny in that regard.

601

#### 602 **Data Availability**

603 Raw data are included in online supplemental file Supplemental Data and are deposited in  
604 Dryad (URL XXX).

605

#### 606 **Acknowledgments**

607 We thank Leigh Boardman, Chao Chen, and Clancy Short for help troubleshooting western  
608 blots, Cody Howard for figure editing, and Joanna Dembek, Stephanie Kowalski, Shannon  
609 Sawtell and Michael Snyder for worm husbandry. We thank Ayush Saxena and Marta Wayne  
610 for helpful discussions. Support was provided by a University of Florida Genetics Institute seed  
611 grant to CFB and DAH, NIH award GM107227 to CFB and E. C. Andersen, and NSF award  
612 DEB 1639005 to DAH. OJM was partially supported by NIH training grant R25GM115298.

613

614



615 **References**

- 616 Ashe, A., A. Sapetschnig, E. M. Weick, J. Mitchell, M. P. Bagijn *et al.*, 2012 piRNAs Can Trigger a  
617 Multigenerational Epigenetic Memory in the Germline of *C. elegans*. *Cell* 150: 88-99.
- 618 Baer, C. F., N. Phillips, D. Ostrow, A. Avalos, D. Blanton *et al.*, 2006 Cumulative effects of spontaneous  
619 mutations for fitness in *Caenorhabditis*: Role of genotype, environment and stress. *Genetics*  
620 174: 1387-1395.
- 621 Baer, C. F., F. Shaw, C. Steding, M. Baumgartner, A. Hawkins *et al.*, 2005 Comparative evolutionary  
622 genetics of spontaneous mutations affecting fitness in rhabditid nematodes. *Proceedings of the*  
623 *National Academy of Sciences* 102: 5785-5790.
- 624 Bates, D., M. Maechler, B. Bolker and S. Walker, 2015 Fitting Linear Mixed-Effects Models Using lme4.  
625 *Journal of Statistical Software* 67: 1-48.
- 626 Boison, D., 2013 Adenosine kinase: Exploitation for therapeutic gain. *Pharmacological Reviews* 65: 906-  
627 943.
- 628 Boyle, E. A., Y. I. Li and J. K. Pritchard, 2017 An Expanded View of Complex Traits: From Polygenic to  
629 Omnigenic. *Cell* 169: 1177-1186.
- 630 Cavalieri, L. F., V. E. Blair and G. B. Brown, 1948 The synthesis of uric acid containing isotopic nitrogen.  
631 *Journal of the American Chemical Society*: 1240.
- 632 Clark, A. G., L. Wang and T. Hulleberg, 1995 Spontaneous mutation rate of modifiers of metabolism in  
633 *Drosophila*. *Genetics* 139: 767-779.
- 634 Curley, J. P., R. Mashoodh and F. A. Champagne, 2011 Epigenetics and the origins of paternal effects.  
635 *Horm Behav* 59: 306-314.
- 636 Davies, S. K., A. Leroi, A. Burt, J. G. Bundy and C. F. Baer, 2016 The mutational structure of metabolism in  
637 *Caenorhabditis elegans*. 70: 2239-2246.
- 638 Demoinet, E., S. Li and R. Roy, 2017 AMPK blocks starvation-inducible transgenerational defects in. *Proc*  
639 *Natl Acad Sci U S A* 114: E2689-E2698.
- 640 Denver, D. R., L. J. Wilhelm, D. K. Howe, K. Gafner, P. C. Dolan *et al.*, 2012 Variation in base-substitution  
641 mutation in experimental and natural lineages of *caenorhabditis* nematodes. *Genome Biology*  
642 *and Evolution* 4: 513-522.
- 643 Dyshlovoy, S. A., K. Otte, S. Venz, J. Hauschild, H. Junker *et al.*, 2017 Proteomic-based investigations on  
644 the mode of action of the marine anticancer compound rhizochalinin. *Proteomics* 17: 170048.
- 645 Eaton, S. L., S. L. Roche, M. Llaverro Hurtado, K. J. Oldknow, C. Farquharson *et al.*, 2013 Total Protein  
646 Analysis as a Reliable Loading Control for Quantitative Fluorescent Western Blotting. *PLoS ONE*  
647 8: e72457.

- 648 Eichler, E. E., J. Flint, G. Gibson, A. Kong, S. M. Leal *et al.*, 2010 Missing heritability and strategies for  
649 finding the underlying causes of complex disease. *Nature Reviews Genetics* 11: 446-450.
- 650 Ferguson, R. E., H. P. Carroll, A. Harris, E. R. Maher, P. J. Selby *et al.*, 2005 Housekeeping proteins: A  
651 preliminary study illustrating some limitations as useful references in protein expression studies.  
652 *Proteomics* 5: 566-571.
- 653 Francesconi, M., and B. Lehner, 2014 The effects of genetic variation on gene expression dynamics  
654 during development. *Nature* 505: 208-211.
- 655 Fry, J. D., and S. L. Heinsohn, 2002 Environment dependence of mutational parameters for viability in  
656 *Drosophila melanogaster*. *Genetics* 161: 1155-1167.
- 657 Furrow, R. E., F. B. Christiansen and M. W. Feldman, 2011 Environment-sensitive epigenetics and the  
658 heritability of complex diseases. *Genetics* 189: 1377-1387.
- 659 Furuhashi, H., T. Takasaki, A. Rechtsteiner, T. Li, H. Kimura *et al.*, 2010 Trans-generational epigenetic  
660 regulation of *C. elegans* primordial germ cells. *Epigenetics Chromatin* 3: 15.
- 661 Greer, E. L., M. A. Blanco, L. Gu, E. Sendinc, J. Liu *et al.*, 2015 DNA Methylation on N6-Adenine in *C.*  
662 *elegans*. *Cell* 161: 868-878.
- 663 Greer, E. L., T. J. Maures, D. Ucar, A. G. Hauswirth, E. Mancini *et al.*, 2011 Transgenerational epigenetic  
664 inheritance of longevity in *Caenorhabditis elegans*. *Nature* 479: 365-371.
- 665 Han, S., E. A. Schroeder, C. G. Silva-García, K. Hebestreit, W. B. Mair *et al.*, 2017 Mono-unsaturated fatty  
666 acids link H3K4me3 modifiers to *C. elegans* lifespan. *Nature* 544: 185-190.
- 667 Hope, I. A., 1999 *C. elegans - A Practical Approach*. Oxford University Press, New York.
- 668 Houle, D., 1992 Comparing evolvability and variability of quantitative traits. *Genetics* 130: 195-204.
- 669 Houle, D., B. Morikawa and M. Lynch, 1996 Comparing mutational variabilities. *Genetics* 143: 1467-  
670 1483.
- 671 Jobson, M. A., J. M. Jordan, M. A. Sandrof, J. D. Hibshman, A. L. Lennox *et al.*, 2015 Transgenerational  
672 Effects of Early Life Starvation on Growth, Reproduction, and Stress Resistance in *Caenorhabditis*  
673 *elegans*. *Genetics* 201: 201-212.
- 674 Johnson, L. M., L. M. Chandler, S. K. Davies and C. F. Baer, 2018 Network Architecture and Mutational  
675 Sensitivity of the *C. elegans* Metabolome. *Frontiers in Molecular Biosciences* 5: 69.
- 676 Kenward, M. G., and J. H. Roger, 1997 Small sample inference for fixed effects from restricted maximum  
677 likelihood. *Biometrics* 53: 983-997.
- 678 Kishimoto, S., M. Uno, E. Okabe, M. Nono and E. Nishida, 2017 Environmental stresses induce  
679 transgenerationally inheritable survival advantages via germline-to-soma communication in  
680 *Caenorhabditis elegans*. *Nat Commun* 8: 14031.

- 681 Lee, H. G., J. Jo, H. H. Hong, K. K. Kim, J. K. Park *et al.*, 2016 State-of-the-art housekeeping proteins for  
682 quantitative western blotting: Revisiting the first draft of the human proteome. *Proteomics* 16:  
683 1863-1867.
- 684 Luna, E., T. J. Bruce, M. R. Roberts, V. Flors and J. Ton, 2012 Next-generation systemic acquired  
685 resistance. *Plant Physiol* 158: 844-853.
- 686 Lynch, M., 1985 Spontaneous Mutations for Life-History Characters in an Obligate Parthenogen.  
687 *Evolution* 39: 804-818.
- 688 Lynch, M., and B. Walsh, 1998 *Genetics and Analysis of Quantitative Traits*. Sinauer, Sunderland, MA.
- 689 Mahajan, A., D. Taliun, M. Thurner, N. R. Robertson, J. M. Torres *et al.*, 2018 Fine-mapping type 2  
690 diabetes loci to single-variant resolution using high-density imputation and islet-specific  
691 epigenome maps. *Nat Genet* 50: 1505-1513.
- 692 Manolio, T. A., F. S. Collins, N. J. Cox, D. B. Goldstein, L. A. Hindorff *et al.*, 2009 Finding the missing  
693 heritability of complex diseases. *Nature* 461: 747-753.
- 694 Marré, J., E. C. Traver and A. M. Jose, 2016 Extracellular RNA is transported from one generation to the  
695 next in *Caenorhabditis elegans*. *Proc Natl Acad Sci U S A* 113: 12496-12501.
- 696 Miersch, C., and F. Doring, 2012 Paternal dietary restriction affects progeny fat content in  
697 *Caenorhabditis elegans*. *Iubmb Life* 64: 644-648.
- 698 Moritz, C. P., 2017 Tubulin or Not Tubulin: Heading Toward Total Protein Staining as Loading Control in  
699 Western Blots. *Proteomics* 17: 1600189–1600200.
- 700 Munir, J., L. A. Dorn, K. Donohue and J. Schmitt, 2001 The effect of maternal photoperiod on seasonal  
701 dormancy in *Arabidopsis thaliana* (Brassicaceae). *Am J Bot* 88: 1240-1249.
- 702 Park, J., and R. S. Gupta, 2008 Adenosine kinase and ribokinase - the RK family of proteins. *Cellular and*  
703 *Molecular Life Sciences* 65: 2875-2896.
- 704 Pembrey, M. E., L. O. Bygren, G. Kaati, S. Edvinsson, K. Northstone *et al.*, 2006 Sex-specific, male-line  
705 transgenerational responses in humans. *Eur J Hum Genet* 14: 159-166.
- 706 Perez, M. F., M. Francesconi, C. Hidalgo-Carcedo and B. Lehner, 2017 Maternal age generates  
707 phenotypic variation in *Caenorhabditis elegans*. *Nature* 552: 106-109.
- 708 Perez, M. F., and B. Lehner, 2019 Intergenerational and transgenerational epigenetic inheritance in  
709 animals. *Nature Cell Biology* 21: 143-151.
- 710 Rando, O. J., and R. A. Simmons, 2015 I'm eating for two: parental dietary effects on offspring  
711 metabolism. *Cell* 161: 93-105.
- 712 Rasmann, S., M. De Vos, C. L. Casteel, D. Tian, R. Halitschke *et al.*, 2012 Herbivory in the previous  
713 generation primes plants for enhanced insect resistance. *Plant Physiol* 158: 854-863.

- 714 Rechavi, O., and I. Lev, 2017 Principles of Transgenerational Small RNA Inheritance in *Caenorhabditis*  
715 *elegans*. *Curr Biol* 27: R720-R730.
- 716 Rechavi, O., G. Minevich and O. Hobert, 2011 Transgenerational Inheritance of an acquired small RNA-  
717 based antiviral response in *C. elegans*. *Cell* 147: 1248-1256.
- 718 Rechtsteiner, A., S. Ercan, T. Takasaki, T. M. Phippen, T. A. Egelhofer *et al.*, 2010 The histone H3K36  
719 methyltransferase MES-4 acts epigenetically to transmit the memory of germline gene  
720 expression to progeny. *PLoS Genet* 6: e1001091.
- 721 Revella, W., 2019 *psych: Procedures for Psychological, Psychometric, and Personality Research*, pp.,  
722 Northwestern University, Evanston, Illinois.
- 723 Rhee, E. P., J. E. Ho, M.-h. Chen, D. Shen, S. Cheng *et al.*, 2013 Resource A Genome-wide Association  
724 Study of the Human Metabolome in a Community-Based Cohort. *Cell Metabolism* 18: 130-143.
- 725 Richard, M. A., T. Huan, S. Lighthart, R. Gondalia, M. A. Jhun *et al.*, 2017 DNA Methylation Analysis  
726 Identifies Loci for Blood Pressure Regulation. *American Journal of Human Genetics* 101: 888-  
727 902.
- 728 Rybak-Wolf, A., M. Jens, Y. Murakawa, M. Herzog, M. Landthaler *et al.*, 2014 A variety of dicer substrates  
729 in human and *C. elegans*. *Cell* 159: 1153-1167.
- 730 Saklayen, M. G., 2018 The Global Epidemic of the Metabolic Syndrome. *Current Hypertension Reports*  
731 20: 12.
- 732 Saxena, A. S., M. P. Salomon, C. Matsuba, S. D. Yeh and C. F. Baer, 2019 Evolution of the Mutational  
733 Process under Relaxed Selection in *Caenorhabditis elegans*. *Molecular biology and evolution* 36:  
734 239-251.
- 735 Schott, D., I. Yanai and C. P. Hunter, 2014 Natural RNA interference directs a heritable response to the  
736 environment. *Sci Rep* 4: 7387.
- 737 Schrider, D. R., D. Houle, M. Lynch and M. W. Hahn, 2013 Rates and genomic consequences of  
738 spontaneous mutational events in *Drosophila melanogaster*. *Genetics* 194: 937-954.
- 739 Sharp, N. P., and A. F. Agrawal, 2012 Evidence for elevated mutation rates in low-quality genotypes. *Proc*  
740 *Natl Acad Sci U S A* 109: 6142-6146.
- 741 Shin, S.-y., E. B. Fauman, A.-k. Petersen, J. Krumsiek, R. Santos *et al.*, 2014 An atlas of genetic influences  
742 on human blood metabolites. 46: 543-550.
- 743 Sulston, J., and J. Hodgkin, 1988 *The Nematode Caenorhabditis elegans*, pp. 587-606. Cold Spring  
744 Harbor Laboratory, Cold Springs Harbor.
- 745 Tabuchi, T. M., A. Rechtsteiner, T. E. Jeffers, T. A. Egelhofer, C. T. Murphy *et al.*, 2018 *Caenorhabditis*  
746 *elegans* sperm carry a histone-based epigenetic memory of both spermatogenesis and  
747 oogenesis. *Nat Commun* 9: 4310.

- 748 Tang, L., and K. P. Choe, 2015 Characterization of *skn-1/wdr-23* phenotypes in *Caenorhabditis elegans*;  
749 pleiotrophy, aging, glutathione, and interactions with other longevity pathways. *Mechanisms of*  
750 *Ageing and Development* 149: 88-98.
- 751 Tauffenberger, A., and J. A. Parker, 2014 Heritable transmission of stress resistance by high dietary  
752 glucose in *Caenorhabditis elegans*. *PLoS Genet* 10: e1004346.
- 753 Teotónio, H., S. Estes, P. C. Phillips and C. F. Baer, 2017 Experimental evolution with *Caenorhabditis*  
754 *nematodes*. *Genetics* 206: 691-716.
- 755 Umbreit, W. W., R. M. C. Dawson, D. C. Elliott and K. M. Jones, 1960 Data for Biochemical Research. AIBS  
756 *Bulletin*.
- 757 Veenendaal, M. V., R. C. Painter, S. R. de Rooij, P. M. Bossuyt, J. A. van der Post *et al.*, 2013  
758 Transgenerational effects of prenatal exposure to the 1944-45 Dutch famine. *BJOG* 120: 548-  
759 553.
- 760 Wainschtein, P., D. P. Jain, L. Yengo, Z. Zheng, L. A. Cupples *et al.*, 2019 Recovery of trait heritability from  
761 whole genome sequence data. *bioRxiv*.
- 762 Yu, H. R., H. C. Kuo, H. C. Huang, L. T. Huang, Y. L. Tain *et al.*, 2011 Glyceraldehyde-3-phosphate  
763 dehydrogenase is a reliable internal control in Western blot analysis of leukocyte subpopulations  
764 from children. *Analytical Biochemistry* 413: 24-29.
- 765 Zalts, H., and I. Yanai, 2017 Developmental constraints shape the evolution of the nematode mid-  
766 developmental transition. *Nature Ecology & Evolution* 1: 0113.
- 767
